# Supplementary material for: Fast and space-efficient taxonomic classification of long reads with hierarchical interleaved XOR filters
Source: HighWire-hosted journal article supplement (doi:10.1101/gr.278623.123), 2024-06-01
Supplement: Supplemental_Table_S1.xlsx [file Supplemental_Table_S1.xlsx]

## Sheet: Table 1
	Supplemental Table S1. Read classification performance. The table summarizes precision, recall and F-scores for each taxonomic classification tool on all taxonomic levels across the short- and long-read metagenomics mock community data sets.
Experiment	Evaluation Level	# Reads	Centrifuge				Kraken2				MetaMaps				Ganon				KMCP				Taxor
			Precision	Recall	F1-Score	F0.5-Score	Precision	Recall	F1-Score	F0.5-Score	Precision	Recall	F1-Score	F0.5-Score	Precision	Recall	F1-Score	F0.5-Score	Precision	Recall	F1-Score	F0.5-Score	Precision	Recall	F1-Score	F0.5-Score
ILMN_D6300	species	1124128	0.745483	0.238685	0.361596	0.523271	0.726622	0.19657	0.309431	0.472047	-	-	-	-	0.933745	0.967819	0.950477	0.940367	0.871477	0.120558	0.211815	0.388059	0.814008	0.480796	0.604527	0.714915
	genus	1124128	0.9611	0.820321	0.885148	0.929207	0.96349	0.789702	0.867982	0.922871	-	-	-	-	0.971204	0.969022	0.970112	0.970767	0.98856	0.767297	0.863987	0.934655	0.881374	0.500664	0.638582	0.765027
	family	1124128	0.986919	0.957326	0.971897	0.980855	0.987475	0.952656	0.969753	0.980309	-	-	-	-	0.98888	0.969559	0.979124	0.984954	0.996678	0.99839	0.997533	0.99702	0.996904	0.531416	0.693272	0.848293
	order	1124128	0.987803	0.958722	0.973045	0.981846	0.988244	0.955937	0.971822	0.981609	-	-	-	-	0.98936	0.969573	0.979367	0.985339	0.996723	0.998541	0.997631	0.997086	0.997117	0.531469	0.693369	0.848444
	class	1124128	0.989294	0.959338	0.974086	0.983154	0.988891	0.958315	0.973363	0.982621	-	-	-	-	0.991748	0.969644	0.980572	0.987247	0.997271	0.999249	0.998259	0.997666	0.997635	0.531598	0.693604	0.84881
ZymoR10.3	species	426213	0.876132	0.740652	0.802715	0.845211	0.739182	0.799406	0.768115	0.75049	0.936065	0.989267	0.961931	0.946243	0.886629	0.882654	0.884637	0.885831	0.943058	0.427712	0.588512	0.759931	0.969655	0.893226	0.929873	0.95334
	genus	426213	0.956344	0.990693	0.973216	0.963022	0.962268	0.991276	0.976557	0.967933	0.968343	0.989621	0.978866	0.972525	0.967648	0.891412	0.927967	0.951375	0.984718	0.647751	0.781457	0.89192	0.9779	0.894031	0.934086	0.95989
	family	426213	0.974361	0.992891	0.983538	0.978011	0.9768	0.994104	0.985376	0.980213	0.979707	0.98974	0.984698	0.981698	0.974456	0.892089	0.931456	0.956788	0.986958	0.708978	0.825186	0.915191	0.985129	0.894726	0.937754	0.965616
	order	426213	0.977329	0.993049	0.985126	0.980433	0.979762	0.994261	0.986958	0.982628	0.982435	0.989768	0.986088	0.983893	0.97901	0.892537	0.933776	0.9604	0.98777	0.710947	0.826803	0.916406	0.987519	0.894955	0.938961	0.967505
	class	426213	0.98384	0.9934	0.988597	0.985737	0.984907	0.99464	0.98975	0.986838	0.987218	0.989817	0.988516	0.987737	0.988777	0.893486	0.938719	0.968127	0.994097	0.717362	0.833356	0.922892	0.99148	0.89533	0.940955	0.970633
ZymoQ20	species	4179959	0.834796	0.666521	0.741228	0.79467	0.729509	0.585483	0.649609	0.695301	0.876084	0.985069	0.927385	0.895908	0.871748	0.943627	0.906264	0.885234	0.878957	0.293355	0.439894	0.628166	0.90948	0.947226	0.927969	0.916787
	genus	4179959	0.897608	0.987671	0.940488	0.914282	0.900177	0.987052	0.941615	0.916307	0.911952	0.985648	0.947369	0.925796	0.878089	0.944012	0.909858	0.890526	0.956938	0.598361	0.736314	0.854521	0.916925	0.947632	0.932025	0.922906
	family	4179959	0.92146	0.990792	0.954869	0.934539	0.925726	0.992976	0.958173	0.938438	0.928019	0.985893	0.956081	0.939044	0.891068	0.944782	0.917139	0.901316	0.96452	0.71011	0.81799	0.90003	0.929502	0.948304	0.938809	0.933203
	order	4179959	0.928757	0.991106	0.958919	0.940592	0.933186	0.993229	0.962271	0.944607	0.934793	0.985993	0.959711	0.944603	0.905517	0.945615	0.925132	0.913263	0.966125	0.71584	0.82236	0.902982	0.936207	0.948655	0.94239	0.93867
	class	4179959	0.944351	0.99183	0.967508	0.953479	0.947207	0.993968	0.970024	0.956204	0.947689	0.986181	0.966552	0.955145	0.938462	0.947424	0.942922	0.940241	0.978102	0.740493	0.842872	0.919117	0.949645	0.949345	0.949495	0.949585
HiFi_D6331	species	1978408	0.883461	0.940192	0.910944	0.894253	0.869905	0.913707	0.891268	0.878327	0.885909	0.945857	0.914902	0.897283	0.820519	0.969248	0.888703	0.846497	0.987213	0.67458	0.801489	0.903471	0.944434	0.972903	0.958457	0.949994
	genus	1978408	0.948291	0.997059	0.972064	0.957659	0.947616	0.995703	0.971065	0.956859	0.948148	0.949231	0.948689	0.948365	0.834104	0.969733	0.89682	0.858108	0.99462	0.793731	0.882892	0.946699	0.975248	0.973737	0.974492	0.974946
	family	1978408	0.986507	0.997812	0.992127	0.988747	0.989439	0.997119	0.993264	0.990966	0.989266	0.951238	0.96988	0.981419	0.994856	0.974499	0.984573	0.990717	0.998624	0.952945	0.97525	0.989141	0.994238	0.974226	0.98413	0.99017
	order	1978408	0.992785	0.998094	0.995433	0.993842	0.995057	0.997692	0.996373	0.995583	0.996631	0.951581	0.973585	0.987283	0.999157	0.974606	0.986729	0.994148	0.999776	0.96151	0.980269	0.991881	0.998455	0.974332	0.986246	0.993535
	class	1978408	0.992879	0.998179	0.995522	0.993935	0.994818	0.998045	0.996429	0.995461	0.99665	0.951582	0.973595	0.987298	0.99916	0.974606	0.986731	0.994151	0.999776	0.96151	0.980269	0.991881	0.998459	0.974332	0.986248	0.993539
																									Precision
																									0.617441
																									0.947562
																									0.918432
																									0.918446
																									0
																									0.916032
																									0.666018
																									0.666075
																									0
																									0.936017
																									0.936597
																									0.936638
																									0
																									0.87138
																									0.0614417
																									0.0615342
																									0.617289
																									0.951568
																									0.921408
																									0.921408
																									0.700679
																									0.951813
																									0.952461
																									0.952468
																										Precision2
																										0.666188
																										0.98784
																										0.991048
																										0.991023
																										0
																										0.933967
																										0.962461
																										0.962384
																										0
																										0.990881
																										0.991495
																										0.991626
																										0
																										0
																										0.481858
																										0.480491
																										0.665879
																										0.991751
																										0.993937
																										0.993937
																										0.731063
																										0.993087
																										0.993831
																										0.993811
