# Supplementary material for: Fast and space-efficient taxonomic classification of long reads with hierarchical interleaved XOR filters
Source: HighWire-hosted journal article supplement (doi:10.1101/gr.278623.123), 2024-06-01
Supplement: Supplemental_Table_S2.xlsx [file Supplemental_Table_S2.xlsx]

## Sheet: Tabelle1
Supplemental Table S2. Classification of contaminated reads. The table shows the percentage of contaminated host reads that were falsly classified as microbial reads for two eukaryotic species.
Experiment	# Reads	Centrifuge	Kraken2	MetaMaps	Ganon	KMCP	Taxor
		% unclassified	% unclassified	% unclassified	% unclassified	% unclassified	% unclassified
Aedes aegypti	685303	0.229023	0.0567005	0.9829	0.9983	1	0.9999
Toxoplasma gondii	142677	0.267394	0.0884165	0.9713	0.9995	1	0.9999
