# Supplementary material for: Fast and space-efficient taxonomic classification of long reads with hierarchical interleaved XOR filters
Source: HighWire-hosted journal article supplement (doi:10.1101/gr.278623.123), 2024-06-01
Supplement: Supplemental_Table_S3.xlsx [file Supplemental_Table_S3.xlsx]

## Sheet: Tabelle1
Supplemental Table S3. Minimum fraction of matching syncmers. The table shows the percentage of syncmers of a given read that needs to match a certain reference to consider it a hit for different sequencing error rates and k-mer sizes.
	k-mer size
Sequence Identity	12	14	16	18	20	22	24	26	28	30
0.8	0.552077	0.195989	0.151428	0.118475	0.0946177	0.0797244	0.0604658	0.0480255	0.0367569	0.0252911
0.81	0.552385	0.207533	0.161204	0.127368	0.103704	0.0881939	0.0689396	0.0556991	0.044185	0.0298818
0.82	0.552239	0.220393	0.17382	0.139866	0.113736	0.0966358	0.0783558	0.0639223	0.0523452	0.0389549
0.83	0.552682	0.236329	0.188152	0.152267	0.126191	0.106106	0.0876917	0.0730642	0.0621864	0.0489249
0.84	0.553172	0.254091	0.202686	0.165344	0.137087	0.116649	0.098822	0.0831266	0.0703342	0.0582562
0.85	0.553716	0.271183	0.219848	0.181959	0.152163	0.130048	0.110622	0.0942414	0.0810792	0.0688187
0.86	0.554532	0.292154	0.240059	0.199738	0.168952	0.144956	0.122726	0.105878	0.0940805	0.0777557
0.87	0.557957	0.313553	0.260912	0.220014	0.186567	0.16101	0.137399	0.119867	0.10453	0.0900014
0.88	0.563925	0.338316	0.283689	0.2401	0.206963	0.179541	0.155347	0.135128	0.121575	0.104741
0.89	0.568519	0.364594	0.310373	0.267578	0.231083	0.20088	0.174376	0.153111	0.139339	0.120042
0.9	0.579726	0.395595	0.338947	0.295287	0.258713	0.22876	0.200759	0.175309	0.161306	0.139616
0.91	0.599258	0.430241	0.371291	0.325596	0.289651	0.257329	0.228011	0.201799	0.186956	0.164794
0.92	0.611572	0.468953	0.410482	0.363923	0.325828	0.293046	0.26167	0.235216	0.216716	0.192162
0.93	0.624341	0.510411	0.452122	0.407016	0.370022	0.334601	0.303413	0.275232	0.254563	0.227871
0.94	0.655724	0.555245	0.498564	0.453201	0.416285	0.381883	0.352291	0.322556	0.299739	0.271481
0.95	0.694872	0.608367	0.552085	0.509395	0.471692	0.437803	0.405938	0.377117	0.354352	0.325132
0.96	0.742071	0.669034	0.613738	0.57366	0.539215	0.50832	0.476855	0.449152	0.42683	0.397277
0.97	0.795543	0.733694	0.68341	0.647737	0.617382	0.588448	0.56083	0.533714	0.514757	0.486399
0.98	0.853121	0.802585	0.763169	0.733734	0.708902	0.684331	0.660171	0.637633	0.621567	0.596993
0.99	0.918163	0.882314	0.854479	0.835831	0.819643	0.804269	0.788526	0.771895	0.763059	0.742114
1	1	1	1	1	1	1	1	1	1	1
